# Supplementary material for: A modified electronegativity equalization method for fast and accurate calculation of atomic charges in large biological molecules
Source: Royal Society of Chemistry journal article supplement (doi:10.1039/b821696g), 2009-01-01
Supplement: b821696g.pdf [file b821696g.pdf]

Supplementary Material:

# **A Modified Electronegativity Equalization Method for fast and accurate calculation of atomic charges in large biological molecules**

YongZhong OuYang, Fei Ye, Yizeng Liang\*

| Page number | Contents                                                                                                                                                                   |
|-------------|----------------------------------------------------------------------------------------------------------------------------------------------------------------------------|
| 2           | Fig S1. Comparison of NPA charges, obtained from original and modified EEM method, with DFT charges at B3LYP/6-31G* level for all atoms in the training set, respectively. |
| 3           | Table S1. Comparison of RMSE and DEV for modified EEM results and original EEM results in a large training set of 141 molecules <sup>a</sup>                               |
| 4-7         | Table S2 : List of 141 number of molecules contained in the calibration set.<br>.                                                                                          |

---

\* Corresponding author. E-mail: YiZeng\_liang@263.net.

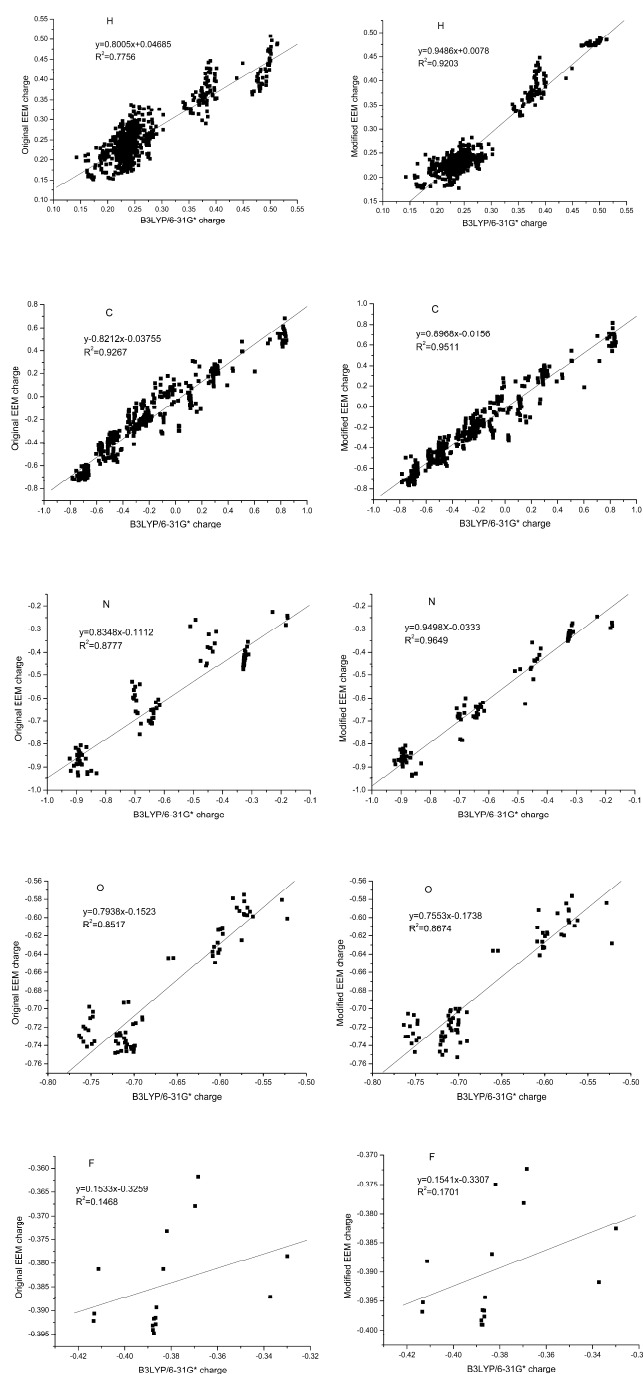

Fig. S1. Comparison of NPA charges, obtained from original and modified EEM method, with DFT charges at B3LYP/6-31G\* level for all atoms in the training set, respectively. (Separate correlations are shown for H, C, N, O and F atom types). Original EEM and Modified EEM charges were obtained using the parameters calibrated in this work from table 2 and 5, respectively. Original EEM parameters are calibrated under the same condition as that of Modified EEM.

**Table S1. Comparison of RMSE and DEV for modified EEM results and original EEM results in a large training set of 141 molecules<sup>a</sup>**

| Atom type <sup>b</sup>       | Modified EEM |        | Number of each atom type or atoms | EEM    |        |
|------------------------------|--------------|--------|-----------------------------------|--------|--------|
|                              | RMSE         | DEV    |                                   | RMSE   | DEV    |
| H(-C)                        | 0.0128       | 0.0144 | 1001                              |        |        |
| H(-N)                        | 0.0202       | 0.0153 | 92                                | 0.0279 | 0.0237 |
| H(-O)                        | 0.0028       | 0.0118 | 46                                |        |        |
| C <sub>sp</sub> <sup>3</sup> | 0.079        | 0.0677 | 363                               |        |        |
| C <sub>sp</sub> <sup>2</sup> | 0.0876       | 0.0192 | 124                               |        |        |
| C <sub>sp</sub>              | 0.0335       | 0.0312 | 35                                | 0.0889 | 0.0845 |
| C(-Ar)                       | 0.0603       | 0.0501 | 89                                |        |        |
| N <sub>sp</sub> <sup>3</sup> | 0.0512       | 0.0453 | 46                                |        |        |
| N <sub>sp</sub> <sup>2</sup> | 0.0406       | 0.0330 | 34                                | 0.0741 | 0.0699 |
| N <sub>sp</sub>              | 0.0111       | 0.0118 | 31                                |        |        |
| O <sub>sp</sub> <sup>3</sup> | 0.0244       | 0.0345 | 49                                |        |        |
| O <sub>sp</sub> <sup>2</sup> | 0.0120       | 0.0266 | 25                                | 0.0243 | 0.0271 |
| F                            | 0.0087       | 0.0177 | 18                                | 0.0095 | 0.0159 |

<sup>a</sup> All values are in eV. <sup>b</sup> The meaning of H (-C), H (-N), H (-O), C<sub>sp</sub><sup>3</sup>, C<sub>sp</sub><sup>2</sup>, C<sub>sp</sub>, N<sub>sp</sub><sup>3</sup>, N<sub>sp</sub><sup>2</sup>, N<sub>sp</sub>, O<sub>sp</sub><sup>3</sup> and O<sub>sp</sub><sup>2</sup> are the same as those mentioned in table 5. “EEM” represent the original EEM, which the same element is assigned to the equal parameters, but was calibrated using the same optimized method and training sets as that of distinction of different atom types in this study.

Table S2 : List of 141 number of molecules contained in the calibration set.

|                                                                                           |                                                                                           |                                                                                           |                                                                                            |                                                                                             |
|-------------------------------------------------------------------------------------------|-------------------------------------------------------------------------------------------|-------------------------------------------------------------------------------------------|--------------------------------------------------------------------------------------------|---------------------------------------------------------------------------------------------|
| 1<br>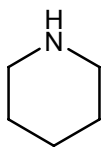    | 2<br>    | 3<br>    | 4<br>    | 5<br>    |
| 6<br>    | 7<br>    | 8<br>    | 9<br>    | 10<br>   |
| 11<br>   | 12<br>   | 13<br>   | 14<br>   | 15<br>   |
| 16<br> | 17<br> | 18<br> | 19<br> | 20<br> |
| 21<br> | 22<br> | 23<br> | 24<br> | 25<br> |
| 26<br> | 27<br> | 28<br> | 29<br> | 30<br> |
| 31<br> | 32<br> | 33<br> | 34<br> | 35<br> |

|                                                                                           |                                                                                           |                                                                                           |                                                                                             |                                                                                             |
|-------------------------------------------------------------------------------------------|-------------------------------------------------------------------------------------------|-------------------------------------------------------------------------------------------|---------------------------------------------------------------------------------------------|---------------------------------------------------------------------------------------------|
| 36<br>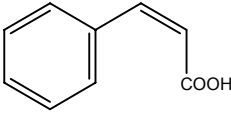   | 37<br>   | 38<br>   | 39<br>   | 40<br>   |
| 41<br>   | 42<br>   | 43<br>   | 44<br>   | 45<br>   |
| 46<br>   | 47<br>   | 48<br>   | 49<br>   | 50<br>   |
| 51<br>  | 52<br>  | 53<br>  | 54<br>  | 55<br>  |
| 56<br> | 57<br> | 58<br> | 59<br> | 60<br> |
| 61<br> | 62<br> | 63<br> | 64<br> | 65<br> |
| 66<br> | 67<br> | 68<br> | 69<br> | 70<br> |
| 71<br> | 72<br> | 73<br> | 74<br> | 75<br> |
| 76<br> | 77<br> | 78<br> | 79<br> | 80<br> |

|                                                                                            |                                                                                            |                                                                                            |                                                                                              |                                                                                              |
|--------------------------------------------------------------------------------------------|--------------------------------------------------------------------------------------------|--------------------------------------------------------------------------------------------|----------------------------------------------------------------------------------------------|----------------------------------------------------------------------------------------------|
| 81<br>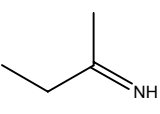    | 82<br>    | 83<br>    | 84<br>     | 85<br>    |
| 86<br>    | 87<br>    | 88<br>    | 89<br>     | 90<br>    |
| 91<br>    | 92<br>    | 93<br>    | 94<br>    | 95<br>    |
| 96<br>   | 97<br>   | 98<br>   | 99<br>    | 100<br>  |
| 101<br> | 102<br> | 103<br> | 104<br>  | 105<br> |
| 106<br> | 107<br> | 108<br> | 109<br>  | 110<br> |
| 111<br> | 112<br> | 113<br> | 114<br>  | 115<br> |
| 116<br> | 117<br> | 118<br> | 119<br> | 120<br> |

|                                                                                            |                                                                                           |                                                                                           |                                                                                            |                                                                                             |
|--------------------------------------------------------------------------------------------|-------------------------------------------------------------------------------------------|-------------------------------------------------------------------------------------------|--------------------------------------------------------------------------------------------|---------------------------------------------------------------------------------------------|
| 121<br>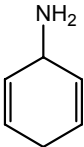   | 122<br>  | 123<br>  | 124<br>  | 125<br>  |
| 126<br>   | 127<br>  | 128<br>  | 129<br> | 130<br>  |
| 131<br>   | 132<br>  | 133<br>  | 134<br> | 135<br>  |
| 136<br>  | 137<br> | 138<br> | 139<br> | 140<br> |
| 141<br> |                                                                                           |                                                                                           |                                                                                            |                                                                                             |
